1 *Type of the Paper (Article, Review, Communication, etc.)*

# 2 **Effects of simulated acid rain on soil respiration rate** 3 **and soil bacterial diversity in a** 4 ***Phyllostachyspubescens* forest in subtropical China**

5 **NanWang<sup>1,2</sup>, XiaochengPan<sup>2,\*</sup>**

6 <sup>1</sup> Center for Ecological Research, Northeast Forestry University, Harbin 150040,  
7 China;wangnan198110@163.com

8 <sup>2</sup> Zhejiang Provincial Key Laboratory of Carbon Cycling in Forest Ecosystems and Carbon Sequestration,  
9 Zhejiang A & F University, LinAn 311300, China.

10 \* Correspondence: 419979237@qq.com; Tel.: +86-575-87760102

11 Received: date; Accepted: date; Published: date

12 **Abstract:** Acid rain has been regarded as a global environmental concern due to its negative  
13 effects on global ecosystems. In this study, we investigated the effects of simulated acid rain (SAR)  
14 on soil respiration rate and soil bacterial diversity in a Moso bamboo (*phyllostachyspubescens*) forest  
15 in subtropical China. Experimental results showed a similar seasonal pattern of soil respiration  
16 rates under different SAR treatments. Seasonal mean soil respiration rates for CK (control, deionized  
17 water, pH 6.7), T1 (pH 5.6), T2 (pH 4.0) and T3 (pH 2.5) treatments were 3.44, 4.80, 4.35 and 4.51  $\mu$   
18 mol m<sup>-2</sup> s<sup>-1</sup>, respectively. One-way analysis of variance indicated that the SAR exposure had no  
19 significant effect on soil respiration ( $p>0.1$ ) and soil microbial biomass ( $p>0.1$ ). Soil bacterial  
20 community diversity was calculated as the Shannon-Wiener diversity index and the results showed  
21 that only T3 treatment had significant effects on soil bacterial diversity. The DGGE analysis results  
22 revealed that T1 and CK soils had closer association and were related to the T2 soil, while T3 soil  
23 was distinctly different from the other treatments. This work highlights that the effects of SAR are  
24 important to consider in assessing the soil respiration rate, particularly under the scenario of  
25 increasing acid rain pollution.

26 **Keywords:** *phyllostachyspubescens* forest; simulated acid rain (SAR); soil respiration; bacterial  
27 community

28

---

## 29 **1. Introduction**

30 Recently, with the rapid growth of worldwide economy and urban population, more and more  
31 sulfur dioxide (SO<sub>2</sub>) and nitrogen oxides (NO<sub>x</sub>) gases are produced during the combustion of fossil  
32 fuels within thermal power plants and automobiles. The emission of these gases into atmosphere  
33 could mix with water vapor in the air to form sulfuric and nitric acid, which later falls as acid rain  
34 [1, 2]. Acid rain has become a global environmental problem and received worldwide attention due  
35 to its environmental damage, including the acidification of soil [3], decrease of microbial  
36 community function and enzyme activities [4-6], negative effects on vegetation, in particular forests  
37 [7], and the changes of soil species composition [8].

38 In China, particularly in the southern part, acid rain is also a serious environmental hazard as  
39 most of the soil there is acidic. South China, Europe and North America have become the three  
40 most severely affected regions by acid rain in the world [9, 10]. As one of the largest CO<sub>2</sub> fluxes in  
41 the global carbon (C) cycle, soil respiration contributes to 68-98 Pg-C to the atmosphere annually [11,  
42 12]. Moreover, belowground C accounts for more than two-thirds of the terrestrial C stock, and  
43 roots and microorganisms in the soils play an important role in atmospheric CO<sub>2</sub> respiration. Thus,  
44 deep understanding of soil respiration process will help us expand the knowledge of the terrestrial  
45 C cycle [13].

46 During the past decades, researchers mainly focused on how acid rain impacted the soil  
47 respiration in forest ecosystems. Acid deposition might directly affect soil respiration by changing  
48 microbial activity, enzyme activity, and the composition of the microbial population, as stated  
49 above. However, the results obtained in previous study were inconsistent. Chen et al. [9] found  
50 little impact on the soil respiration by simulated acid rain (SAR), while Blagodaskaya and Anderson  
51 [14] revealed that soil respiration corresponded with SAR loads, which might be associated with the  
52 adaptability of bacterial community [15]. Likewise, acid deposition might indirectly influence soil  
53 respiration due to the decrease of pH. Spain [16] revealed that organic C content in soil increased  
54 when pH in soil decreased, while Baath and Anderson [17] observed an increase of soil respiration  
55 rates along with the decrease of pH in soil.

56 *Phyllostachyspubescens*, a typical and economic bamboo species, is widely grown in South  
57 China, due to its rapid growth rate and forest formation, high revenue, widespread use, and high  
58 regeneration capacity. In China, the bamboo-growing area is increasing year by year and  
59 *phyllostachyspubescens* (referred as bamboo forest afterwards) forest has become an important  
60 ecosystem type. Unfortunately, few investigations have focused on the impacts of acid rain on soil  
61 respiration in bamboo forest, and to our knowledge, the long-term *in situ* experiment was missing.  
62 Also, the information about the effect of acid rain on bacteria microbial community in bamboo  
63 forest is rare. Thus, studying soil respiration and microbial community in bamboo forest  
64 (subtropical forest) subject to SAR treatments is important for understanding their functions in C  
65 cycling/ecosystem C flux.

66 In this study, we measured the soil respiration, soil microbial biomass (characterized as soil  
67 microbial biomass C (C<sub>mic</sub>) and soil microbial biomass nitrogen (N<sub>mic</sub>)) and microbial community  
68 change in a bamboo forest, a subtropical soil environment. The selected forest was subject to 10  
69 months of artificial acid rain to evaluate if soil respiration and the microbial community is altered  
70 by different SAR levels.

## 71 2. Materials and Methods

### 72 2.1 Site description

73 In 2015, experiments were conducted at Tianmu Mountain (30.30°N, 119.45°E) near Hangzhou  
74 city, in Zhejiang province, China. The detailed information about Tianmu Mountain could be seen  
75 in Wang et al. [18]. The bamboo forest is at 500 m elevation and adjoins evergreen broad-leaf forest  
76 and commonly mixed grow with *Castanopsis sclerophylla*, *Castanopsis myrsinaefolia*,  
77 *Zelkova schneideriana*, and *Liquidambar formosana*. The area of bamboo forest occupies 875,000m<sup>2</sup>, and  
78 understory species are rare, including *Camellia sinensis*, *Eurya hebeclados*, *Cyclobalanopsis gracilis*,

79 *Cyclobalanopsis myrsinifolia*, *Rhododendron ovatum* and *Lithocarpus brevicaudatus*. The properties of soil  
80 at the end of the experiment are shown in Table 1.

### 81 2.2 SAR treatment

82 The experiment was conducted since September, 2016. Twelve sample plots (10 m×10 m) were  
83 selected and divided into four groups, and the twelve sample plots were almost at the same  
84 elevation to avoid the effect of mountain slope gradient on soil respiration as much as possible.  
85 According to the acid rain characteristic and acid deposition levels in Lin' An, Jiangsu province,  
86 four groups of experiments were designed as follows: control experiment (termed as CK), only  
87 deionized water was applied to the experimental sites and the pH was approximately 6.7; T1-T3  
88 experiment, prepared acid rain was applied to the corresponding sites and the pH was 5.6, 4.0 and  
89 2.5 respectively. The simulated acid rain was prepared from deionized water and contained H<sub>2</sub>SO<sub>4</sub>  
90 and HNO<sub>3</sub> with a mole ratio of 4.5:1 [19]. Throughout the duration of the experiment, 10 L of the  
91 simulated acid rain were applied to each site twice a week (or postponed in case of rain or high soil  
92 humidity). In order to ensure the acid rain permeated into the soil evenly, we used a simulation  
93 apparatus capable of delivering droplet sizes in the range of 1.0 to 1.2 mm diameter. The  
94 experimental sites were subjected to simulated acid rain treatments for 10 months.

95

### 96 2.3 Soil respiration rate measurement

97 Soil respiration rate was measured according to Chen et al. [1]. The PVC soil collar (20 cm in  
98 diameter) was permanently installed (5 cm) into the soil in each site and soil packing by PVC collar  
99 was minimized. In order to minimize the impact of aboveground respiration by living plants  
100 during soil respiration rate measurement, we removed the living plants within the soil collar  
101 completely prior to measurements. Measurements were generally implemented once a month from  
102 September 2016 to July 2017. The detailed information about soil temperature and moisture  
103 measurement can be found in Chen et al. [1]. Each measurement started at 09:00 am and the whole  
104 process lasted for about 2-3 hour, including 30 min for preheat, and transport [20]. In order to  
105 guarantee the accuracy, a preheat measurement was performed to exclude the residual gas inside  
106 the instrument prior to formal measurement. Furthermore, during each measurement, the distance  
107 between surveyors and gas analyzer should be more than 2 m to avoid the disturbance. The moist  
108 soil samples at each site were collected and pretreated for C<sub>mic</sub> and N<sub>mic</sub> analysis [21]. In brief, The  
109 C<sub>mic</sub> and N<sub>mic</sub> values were determined on the <2-mm mesh field-moist samples. Soil C<sub>mic</sub> was  
110 estimated on a 7.3-g oven-dry equivalent of field-moist soil sample by the  
111 chloroform-fumigation-extraction method and soil N<sub>mic</sub> was determined by  
112 chloroform-fumigation-incubation method using a 7.3-g oven-dry equivalent of field-moist soil  
113 sample, after adjusting the moisture content to 55%. The correction factors applied to C<sub>mic</sub> and N<sub>mic</sub>  
114 calculation were 0.45 and 0.57. Soil temperature (°C) and moisture (g water/kg soil) at the depth of 5  
115 cm were monitored adjacent to each PVC collar using a probe connected to the Li-8100 during the  
116 soil respiration rate measurements.

117

### 118 2.4 Statistical analysis

119 Soil respiration rate in each treatment was calculated as the mean of the measurements from 3  
120 collars. The significant level of the soil respiration rate among the SAR treatments (including CK)

121 was tested using a *t*-test proposed by Luo et al. [42]. One-way ANOVA was used to test the SAR  
122 effects on bacterial diversity and microbial biomass. All the statistical analyses were performed  
123 using Excel 2007 (Microsoft Inc. Seattle, WA, USA) and the SPSS software version 11.0.

124

### 125 *2.5 Bacterial community*

126 At the end of the experiments, soils in twelve sample plots were collected to analyze bacterial  
127 microbial community and ten cores (5 cm diameter × 20 cm length) were taken from each sampling  
128 plot and mixed. The twelve samples were shipped to lab as soon as possible and subsequently  
129 sieved through a 2 mm mesh to avoid the interference of plant debris and soil fauna. Total DNA  
130 were firstly extracted according to Zhou et al. [22] and then purified as per Cahyani et al. [23]. The  
131 DNA yield, quality and purity were assessed as described by Chang et al. [24]. The universal  
132 bacterial primers, PRBA338f and PRUN518r, located at the V3 region of the 16S rRNA genes of  
133 bacterioplankton, were used to amplify the variable V3 region of 16S rDNA. The detailed procedure  
134 for PCR amplification and DGGE analysis was implemented as described previously by Chang et al.  
135 [24]. Bacterial community diversity was calculated as the Shannon-Wiener diversity index [22].

136

## 137 **3. Results and Discussion**

### 138 *3.1 Effect of SAR on soil respiration rates*

139 Soil temperature was measured periodically during the whole experiment and the measured  
140 results showed that the temperature in soil seasonally changed accompanying with the change of  
141 air temperature in experimental site (**Table 2**). Soil temperature and moisture are generally  
142 considered two basic factors in controlling soil respiration process. In our study, when the entire  
143 experimental period was considered, seasonal variability of soil respiration rate was mainly  
144 controlled by soil temperature, as the absolute value of difference in moisture content among all the  
145 sampled soil was small. The moisture content probably mediated the responses of soil respiration  
146 rate to temperature [43].

147 **Figure 1** showed the seasonal variation of soil respiration rates subject to SAR exposure. For  
148 each group experiment, the soil respiration rates varied seasonally following a similar trend with  
149 soil temperature: from September 2016 to January 2017, soil respiration rate decreased during  
150 winter, followed by a sharp increase during spring and summer from March 2017 to July 2017. This  
151 observation was in accordance with that reported by Chen et al. [1]. Seasonal mean soil respiration  
152 rate for the CK, T1, T2 and T3 treatments were 3.44, 4.80, 4.35 and 4.51  $\mu\text{mol m}^{-2} \text{s}^{-1}$ , respectively  
153 (**Figure 2**). However, the soil respiration rates among the four group experiments were not regular.  
154 For example, the soil respiration rate of T2 was lowest at the beginning of the experiment while it  
155 reached to highest value at the end of the experiment. At each sampling point, no typical trend with  
156 the strength of SAR was observed, which suggested that it's not easy to clearly state how the  
157 different SAR treatments impacted on the soil respiration rates herein.

158

159 Compared with CK (control, deionized water, pH 6.7), all the SAR treatments in this study  
160 (including T1 (pH 5.6), T2 (pH 4.0), T3 (pH 2.5)) induced a positive effect on the soil respiration rate.  
161 Soil respiration rates under T1, T2 and T3 treatments were enhanced by 39.5%, 26.5% and 31.1%,

162 respectively, relative to that of CK treatment. However, ANOVA results indicated that different  
163 SAR exposure of T1, T2 and T3 had no significant effects on soil respiration ( $p>0.1$ ), although SAR  
164 are generally considered to have inhibition effect on soil respiration rate [40]. Although effect of  
165 SAR treatments on soil respiration has been widely studied, results from these studies were  
166 inconsistent. For example, Will et al. [25] revealed that acid rain impacted little on the soil CO<sub>2</sub> flux  
167 while Zelles et al. [26] observed a decreased CO<sub>2</sub> emission when an artificial acidic soil subject to  
168 SAR exposure and this negative effects might be contributed to the inhibited activity of soil  
169 microbes by low pH in the soil. What's more, an enhanced soil CO<sub>2</sub> flux was also reported when a  
170 low concentration of simulated acid rain was applied to the soil [27], which was in consistent with  
171 our results in this study. Organisms in soil may mediate themselves to the changing acid  
172 environment and meanwhile soil could buff the SAR effects on soil to a certain degree. The  
173 enhanced effect may result from nutrients, such as nitrate nitrogen (NO<sub>3</sub><sup>-</sup>-N), that are used to  
174 acidify the simulated acid rain [41]. The inconsistent results with regard to the effect of SAR on soil  
175 respiration could be justified using several lines of reasoning, including the length of experimental  
176 period [1], and the applied simulated acid rain treatment [28]. The soil respiration rate almost  
177 maintained constant at pH 4 and pH 6, while decreased 20% at pH 3. Also, the effect of SAR on soil  
178 respiration rate was reported to be relied on geographic locations [28]. Compared with microbes in  
179 temperate soil, SAR treatment impacted the microbes in subarctic soil more greatly. And soil  
180 respiration rates are more easily to be affected by SAR in dry nutrient-poor forests than in medium  
181 and mesic forests.

182 Soil enzyme activity is the direct expression of the soil microbial community to the metabolic  
183 requirements and available [9]. The soil enzymatic activities, including phosphatase, urease and  
184 sucrase were shown in **Table 1**. SAR treatments (T1 and T2) resulted in a decrease in urease and  
185 sucrase activity, although the differences between CK and SAR treatments were not significant.  
186 This finding might be attributed to a potential trade-off between the organisms showing positive  
187 responses to SAR and others showing negative responses.

188

### 189 3.2 Effect of SAR on soil microbial biomass

190 **Figure 3** showed the variations of soil microbial biomass subject to SAR exposure and the  
191 average values were plotted in the figure. The soil microbial biomass of CK treatment in September,  
192 2014 was not included in the figure as the soil samples were lost during transportation.

193 In winter (November/December, 2016), the concentrations of C<sub>mic</sub> and N<sub>mic</sub> were generally  
194 lower than that in the other sample dates. Possible explanation for the observation would be the  
195 lower microbial activity of the soil in the winter [46]. It was observed a more pronounced temporal  
196 fluctuation of N<sub>mic</sub> values compared with those of C<sub>mic</sub>, in agreement with those reported by  
197 Moore et al. [21]. Although C and N are the main compositions of microorganisms, their  
198 concentrations in microbes vary greatly, especially the N content, and notably depend on the  
199 growth stage of microbes. The soil pH held a clearly effect on the microbial biomass and low soil  
200 pH would lead to a low microbial biomass content [29]. However, ANOVA analysis results  
201 indicated that the difference in soil microbial biomass subject to SAR exposure was not significant  
202 ( $p>0.1$ ) in this study. Furthermore, the concentrations of C<sub>mic</sub> and N<sub>mic</sub> at all the SAR treatments  
203 were comparable or even stimulated compared with CK treatment, which was in consistent with

204 the trend of soil respiration rate. The microbial community might have adapted to the simulated  
205 acid rain conditions during the long-term experiment. Neither Cmic nor Nmic was significantly  
206 correlated with soil pH. Possible explanations for this observation were that the pH of soils used in  
207 this study was acidic, and a small change of pH caused by acid rain had a minimum effect on the  
208 soil microbial biomass. Carter and Rennie[30] revealed that higher pH would enhance microbial  
209 biomass content and microbial biomass content would conversely get lost with a lower pH applied.  
210 Besides the soil pH, the microbial biomass content would also be affected by other environmental  
211 conditions. Wolters [31] found that the decreased soil pH did not impact microbial biomass content  
212 until the soil pH was lower than 2 or 3. Besides, the type of acid rain (sulfuric acid or nitric acid)  
213 would influence the microbial biomass content. Nitric acid has proven to be capable of positively  
214 and negatively impacting microbial biomass, and the variable effects mainly depend on the soil's N  
215 threshold value. For example, Bewley and Stotzky[32] found an inhibitory effect of nitric acid on  
216 microbial biomass and activity; while Killham et al. [33] reported that nitric acid showed a  
217 stimulated effect on microbial biomass and activity exposure to nitric acid.

218

### 219 *3.3 Effect of SAR on soil bacterial community diversity*

220 The bacterial community diversity was presented as Shannon index. As shown in **Table 3**, only  
221 soil bacterial diversity of T3 was significantly different from that of CK based on the obtained value  
222 of LSD0.05. Cluster analysis showed that T1 and CK soils had closer association and were related to  
223 the T2 soil, while T3 soil was distinctly different from the other treatments (**Figure 4**). The result  
224 clearly demonstrated that DGGE profiles revealed marked differences in the response of soil  
225 bacterial communities under different SAR treatments.

226 Soil bacterial microbial diversity may be influenced by simulated acid rain exposure [44, 45].  
227 However, the obtained findings with regard to the effect of SAR on soil bacterial microbial diversity  
228 seemed controversial. For example, Pennanen et al. [34] reported that the amount of bacterial  
229 measured decreased with increasing pH and bacteria were more affected than fungi by the  
230 acidification. Anderson and Domsch[35] also found that the total microbial biomass was more  
231 sensitive to acidic pH than to a neutral pH. Besides, McColl and Firestone [36] and Stemmer et al.  
232 [37] observed that acid rain hardly impacted bacterial community in soil. In contrast, Pennanen et  
233 al. [38] showed that the bacteria in soil microbial community would increase when humus pH was  
234 decreased and the bacteria in soil could adapt to the new acidic environment step by step. Similarly,  
235 Wang et al. [39] found a stimulated effect on soil microbial diversity after being subjected to  
236 simulated acid rain (pH 4.5/5.5). In our study, a high acid not only stimulated soil respiration  
237 (compared with CK experiment) but also increased soil bacterial community diversity. Up to now  
238 there was no consensus in this argument and many factors could contribute to this contradiction,  
239 like the treatment period, species, and the soil sampling procedure used, which deserves further  
240 research in future. In present study, bacterial community was analyzed by DGGE method with  
241 universal bacterial primers, which could reflect the genetic diversity of a microbial community and  
242 has the advantages of being reliable, reproducible, rapid, and allows screening of multiple samples.  
243 However, it also has several limits, such as effect of variable DNA extraction efficiency on DGGE  
244 profiles, similarities in the mobility characteristics of the polyacrylamide gel of DNA fragments  
245 with different sequences, and dependence of DGGE profiles on soil type being tested and choice of

246 primers [24]. Therefore, different approaches such as PLFA analysis, Biolog and molecular  
247 technology should be used to better investigate the effect of acid rain on soil microbial  
248 communities.

249

#### 250 4. Conclusions

251 It can be concluded that the different SAR treatments showed similar seasonal pattern of soil  
252 respiration rate in *phyllostachyspubescens* forest in subtropical China. SAR had no significant effects  
253 on both soil respiration rate and soil microbial biomass. The soil bacterial diversity analysis  
254 indicated that only T3 treatment (pH 2.5) showed a significant effect on soil bacterial diversity  
255 relative to that of CK, and the higher acid load (T2 and T3) increased the soil bacterial diversity in  
256 terms of Shannon index. Overall, the impacts of acid rain in bamboo forest ecosystem was  
257 highlighted in this study and studying soil respiration and microbial community in bamboo forest  
258 (subtropical forest) subject to SAR treatments could contribute for understanding their functions in  
259 C cycling/ecosystem C flux.

260 **Acknowledgments:** This work was supported by Zhejiang Provincial Natural Science Foundation of China  
261 (LY15C160005 and LQ19C160013) and Foundation of Zhejiang Educational Committee (Y201329652).

262 **Author Contributions:** Nan Wang performed the experiments and wrote the paper; Xiaocheng Pan designed  
263 the experiments and reviewed the paper.

264 **Conflicts of Interest:** The authors declare no conflict of interest.

#### 265 References

- 266 1. Chen, S.T.; Shen, X.S.; Hu, Z.H.; Chen, H.S.; Shi, Y.S.; Liu, Y. Effects of simulated acid rain on soil CO<sub>2</sub>  
267 emission in a secondary forest in subtropical China. *Geoderma* 2012, 189-190, 65-71.
- 268 2. Calace, N.; Fiorentini, F.; Petronio, B.M.; Pietroletti, M. Effects of acid rain on soil humic  
269 compounds. *Talanta* 2001, 54, 837-846.
- 270 3. Liao, B.H.; Guo, Z.H.; Zeng, Q.R.; Probst, A.; Probst, J.L. Effects of acid rain on competitive releases of  
271 Cd, Cu, and Zn from two natural soils and two contaminated soils in Hunan, China. *Water Air Soil  
272 Poll.* 2007, 7, 151-161.
- 273 4. Singh, R.K.; Dutta, R.K.; Agrawal, M. Litter decomposition and nutrient release in relation to  
274 atmospheric deposition of S and N in a dry tropical region. *Pedobiologia* 2004, 48, 305-311.
- 275 5. Jagels, R.; Jiang, M.; Marden, S.; Carlisle, J. Red spruce canopy response to acid fog exposure. *Atmos.  
276 Res.* 2002, 64, 169-178.
- 277 6. Kuperman, R.G.; Edwards, C.A. Effects of acidic deposition on soil invertebrates and  
278 microorganisms. *Rev. Environ. Contam. Toxicol.* 1997, 148, 35-137.
- 279 7. Bini, C.; Bresolin, F. Soil acidification by acid rain in forest ecosystems: A case study in northern Italy.  
280 *Sci. Total Environ.* 1998, 222, 1-15.
- 281 8. Schaberg, P.G.; DeHayes, D.H.; Hawley, G.J. Anthropogenic calcium depletion: a unique threat to  
282 forest ecosystem health? *Ecosystem Health* 2001, 7, 214-228.
- 283 9. Chen, S.T.; Zhang, X.; Liu, Y.F.; Hu, Z.H.; Shen, X.S.; Ren, J.Q. Simulated acid rain changed the  
284 proportion of heterotrophic respiration in soil respiration in subtropical secondary forest. *Appl. Soil  
285 Ecol.* 2015, 86, 148-157.
- 286 10. Fan, H.B.; Wang, Y.H. Effects of simulated acid rain on germination, foliar damage, chlorophyll  
287 contents and seedling growth of five hardwood species growing in China. *Forest Ecol. Manag.* 2000,  
288 126, 321-329.
- 289 11. Gomez-Casanovas, N.; Anderson-Teixeira, K.; Zeri, M.; Bernacchi, C.J.; Delucia, E.H. Gap filling  
290 strategies and error in estimating annual soil respiration. *Global Change Biol.* 2013, 19, 1941-1952.
- 291 12. Bond-Lamberty, B.; Thomson, A. Temperature-associated increases in the global soil respiration  
292 record. *Nature* 2010, 464, 579-582.7.

- 293 13. Davidson, E.A.; Janssens, I.A. Temperature sensitivity of soil carbon decomposition and feedbacks to  
294 climate change. *Nature* 2006, 440, 165-173.
- 295 14. Blagodatskaya, E.V.; Anderson, T.H. Adaptive responses of soil microbial communities under  
296 experimental acid stress in controlled laboratory studies. *Appl. Soil Ecol.* 1999, 11, 207-216.
- 297 15. Ouyang, X.J.; Zhou, G.Y.; Huang, Z.L.; Liu, J.X.; Zhang, D.Q.; Li, J. Effect of simulated acid rain on  
298 potential carbon and nitrogen mineralization in forest soils. *Pedosphere* 2008, 18, 503-514.
- 299 16. Spain, A.V. Influence of environmental conditions and some soil chemical properties on the carbon  
300 and nitrogen contents of some tropical Australian rainforest soils. *Soil Res.* 1990, 28, 825-839.
- 301 17. Baath, E.; Anderson, T.H. Comparison of soil fungal/bacterial ratios in a pH gradient using  
302 physiological and PLFA-based techniques. *Soil Biol. Biochem.* 2003, 35, 955-963.
- 303 18. Wang, N.; Bai, S.B. Effects of simulated acid rain on soil respiration of *Pinus massoniana*. *Appl.*  
304 *Mechanics Materials* 2013, 295-298, 249-254.
- 305 19. Hou, Q.; Zhao, Y.X. An analysis on characteristics of regional acid rain over China in 2007. *Adv. In.*  
306 *Climate Change Res.* 2009, 5, 7-11.
- 307 20. Tang, X.L.; Liu, S.G.; Zhou, G.Y.; Zhang, D.Q.; Zhou, C.Y. Dependence of soil respiration on soil  
308 temperature and soil moisture in successional forests in southern China. *Global Change Biol.* 2006, 12,  
309 1-15.
- 310 21. Moore, J.M.; Klose, S.; Tabatabai, M.A. Soil microbial biomass carbon and nitrogen as affected by  
311 cropping systems. *Biol. Fertil. Soils* 2000, 31, 200-210.
- 312 22. Zhou, J.; Bruns, M.A.; Tiedje, J.M. DNA recovery from soils of diverse composition.  
313 *Appl. Environ. Microbiol.* 1996, 62, 316-322.
- 314 23. Cahyani, V.R.; Matsuya, K.; Asakawa, S.; Kimura, M. Succession and phylogenetic composition of  
315 bacterial communities responsible for the composting process of rice straw estimated by PCR-DGGE  
316 analysis. *Soil Sci. Plant Nutr.* 2003, 49, 619-630.
- 317 24. Chang, E.H.; Tian, G.L.; Chiu, C.Y. Soil microbial communities in natural and managed cloud  
318 montane forests. *Forests* 2017, 8, 33.
- 319 25. Will, M.E.; Graetz, D.A.; Roof, B.S. Effect of simulated acid precipitation on soil microbial activity in a  
320 typical quartzite samment. *J. Environ. Qual.* 1986, 15, 399-403.
- 321 26. Zelles, L.; Scheunert, I.; Kreutzer, K. Bioactivity in limed soil of a spruce forest. *Biol. Fertility Soils*  
322 1987, 4, 137-143.
- 323 27. Saloni, P.O. Respiration rates in forest soil organic horizon materials treated with simulated acid  
324 rain. *Canadian J. Forest Res.* 1990, 20, 910-913.
- 325 28. Vanhala, P.; Fritze, H.; Neuvonen, S. Prolonged simulated acid rain treatment in the subarctic: Effect  
326 on the soil respiration rate and microbial biomass. *Biol. Fertility Soils* 1996, 23, 7-14.
- 327 29. Wardle, D.A. A comparative assessment of factors which influence microbial biomass carbon and  
328 nitrogen levels in soil. *Biol. Rev.* 1992, 67, 321-358.
- 329 30. Carter, M.R.; Rennie, D.A. Changes in soil quality under a zero tillage farming system: distribution of  
330 microbial biomass and mineralizable C and N potentials. *Can. J. Soil Sci.* 1982, 62, 587-597.
- 331 31. Wolters, V. Biological processes in two beech forest soils treated with simulated acid rain—a  
332 laboratory experiment with *Isotomatigrina* (Insecta: Collembola). *Soil Biol. Biochem.* 1991, 23, 381-390.
- 333 32. Bewley, R.J.F.; Stotzky, G. Simulated acid rain ( $H_2SO_4$ ) and microbial activity in soil. *Soil*  
334 *Biol. Biochem.* 1983, 15, 431-437.
- 335 33. Killham, K.; Firestone, M.K.; McColl, J.G. Acid rain and soil microbial activity: effects and their  
336 mechanisms. *J. Environ. Qual.* 1983, 12, 133-137.
- 337 34. Pennanen, T.; Fritze, H.; Vanhala, P.; Kiikkila, O.; Neuvonen, S.; Baath, E. Structure of a microbial  
338 community in soil after prolonged addition of low levels of simulated acid rain.  
339 *Appl. Environ. Microbiol.* 1998a, 64, 2173-2180.
- 340 35. Anderson, T.H.; Domsch, K.H. The metabolic quotient for  $CO_2$  ( $qCO_2$ ) as a specific activity parameter  
341 to assess the effects of environmental conditions, such as pH, on the microbial biomass of forest soils.  
342 *Soil Biol. Biochem.* 1993, 25, 393-395.
- 343 36. McColl, J.G.; Firestone, M.K. Soil chemical and microbial effects of simulated acid rain on clover and  
344 soft chess. *Water Air Soil Poll.* 1991, 60, 301-313.



- 345 37. Stemmer, M.;Watzinger, A.;Blochberger, K.;Haberhauer, G.;Gerzabek, M.H. Linking dynamics of soil  
346 microbial phospholipid fatty acids to carbon mineralization in a <sup>13</sup>C natural abundance experiment:  
347 impact of heavy metals and acid rain. *Soil Biol.Biochem.*2007, 39, 3177-3186.
- 348 38. Pennanen, T.;Perkiomaki, J.;Kiikkila, O.;Vanhala, P.;Neuvonen, S.;Fritze, H. Prolonged, simulated  
349 acid rain and heavy metal deposition: separated and combined effects on forest soil microbial  
350 community structure. *FEMS Microbiol. Ecol.*1998b, 27, 291-300.
- 351 39. Wang, L.; Chen,Z.;Shang, H.; Wang, J.; Zhang, P.Y. Impact of simulated acid rain on soil microbial  
352 community function in Masson pine seedlings. *Electronic J.Biotechnol.*2014, 17, 199-203.
- 353 40. Fritze, H. Effects of environmental pollution on forest soil microflora-a review. *Silva. Fenn.* 1992, 26,  
354 37-47.
- 355 41. Percy, K.E. The effects of simulated acid rain on germinative capacity, growth and morphology of  
356 forest tree seedlings. *New Phytol.* 1986, 104, 473-484.
- 357 42. Luo, Y.; Wan, S.; Hui, D.; Wallace, L.L. Acclimatization of soil respiration to warming in a tall grass  
358 prairie. *Nature* 2001, 413, 622-625.
- 359 43. Wan, S.Q.; Norby, R.J.; Ledford, J.; Weltzin, A. Responses of soil respiration to elevated CO<sub>2</sub>, air  
360 warming, and changing soil water availability in model old-field grassland. *Global Change Biol.*  
361 2007, 13, 2411-2424.
- 362 44. Baath, E.; Lundgren, B.; Soderstrom, B. Effects of artificial acid rain on microbial activity and  
363 biomass. *Bull. Environm. Contam. Toxicol.* 1979, 23, 737-740.
- 364 45. Baath, E.; Lundgren, B.; Soderstrom, B. Fungal populations in podzolic soil experimentally acidified  
365 to simulate acid rain. *Microl. Ecol.* 1984, 10, 197-203.
- 366 46. Lodge, D.J.; Winter D.; Gonzalez, G.; Clum, N. Effects of hurricane-felled tree trunks on soil carbon,  
367 nitrogen, microbial biomass, and root length in a wet tropical forest. *Forests* 2016, 7, 264.

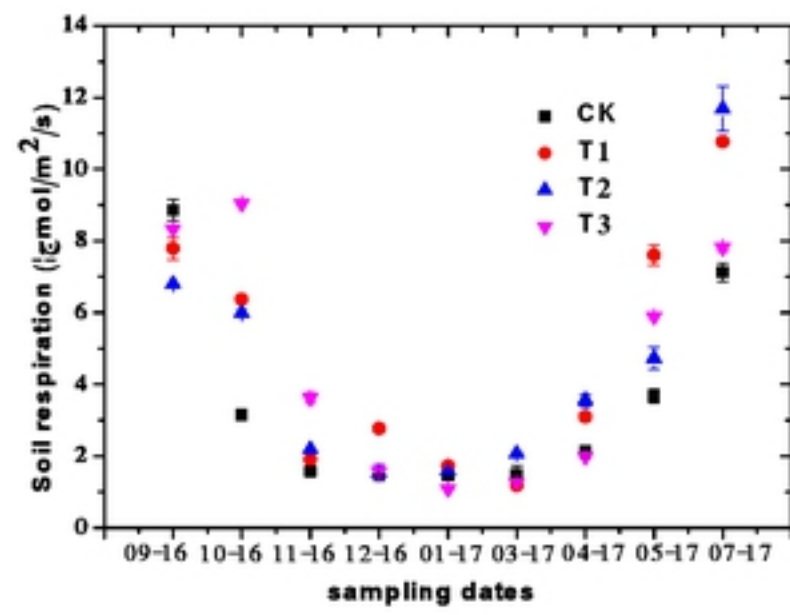

bioRxiv preprint doi: <https://doi.org/10.1101/688838>; this version posted July 1, 2019. The copyright holder for this preprint (which was not certified by peer review) is the author/funder, who has granted bioRxiv a license to display the preprint in perpetuity. It is made available under aCC-BY 4.0 International license.

**Figure 1. Seasonal variations of soil respiration under different SAR treatments**  
(sampling date: month-year)

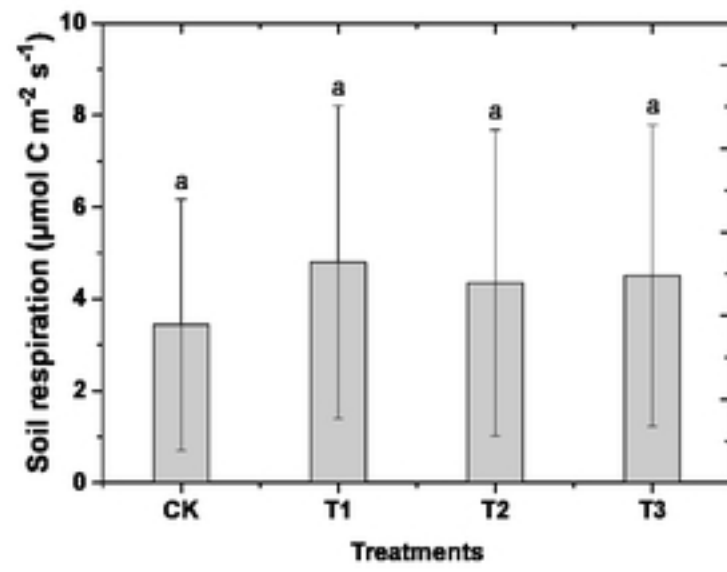

bioRxiv preprint doi: <https://doi.org/10.1101/688838>; this version posted July 1, 2019. The copyright holder for this preprint (which was not certified by peer review) is the author/funder, who has granted bioRxiv a license to display the preprint in perpetuity. It is made available under aCC-BY 4.0 International license.

**Figure 2 Mean soil respiration rates for different SAR treatments (Error bars are standard error of the mean; the same letter above the column are not significantly different between different treatments)**

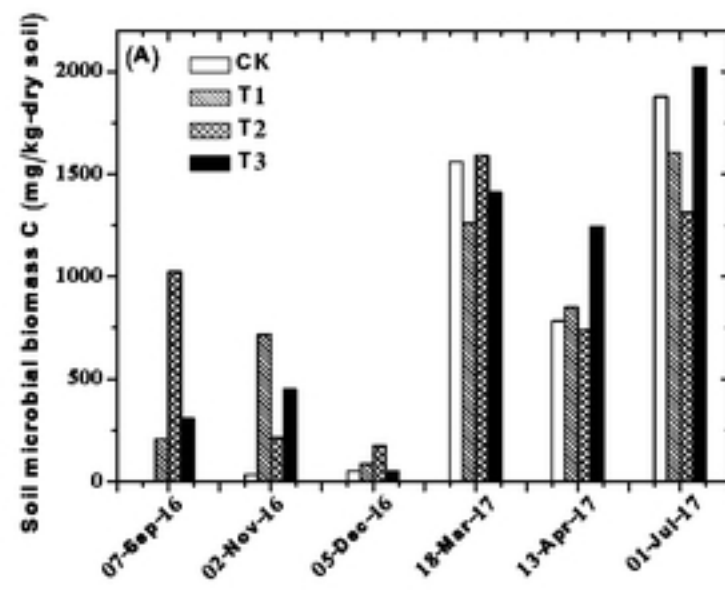

bioRxiv preprint doi: <https://doi.org/10.1101/688838>; this version posted July 1, 2019. The copyright holder for this preprint (which was not certified by peer review) is the author/funder, who has granted bioRxiv a license to display the preprint in perpetuity. It is made available under aCC-BY 4.0 International license.

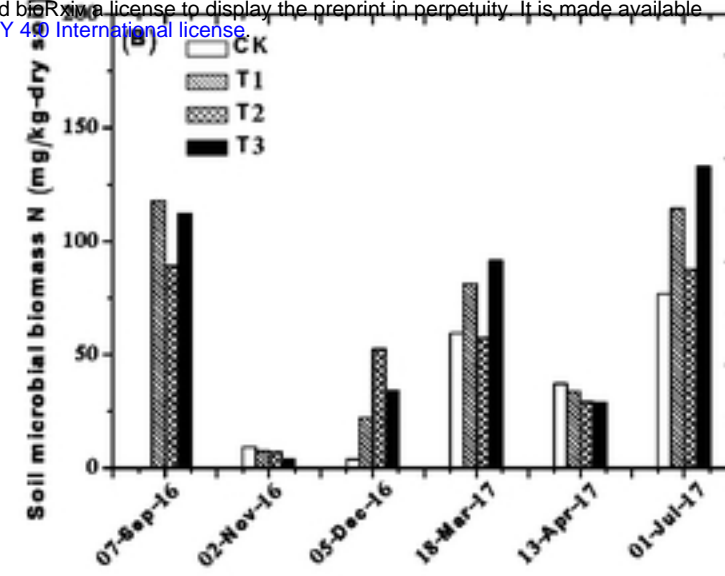

Figure3 Seasonal variations of soil microbial biomass C (A) and N (B) under different SAR treatments

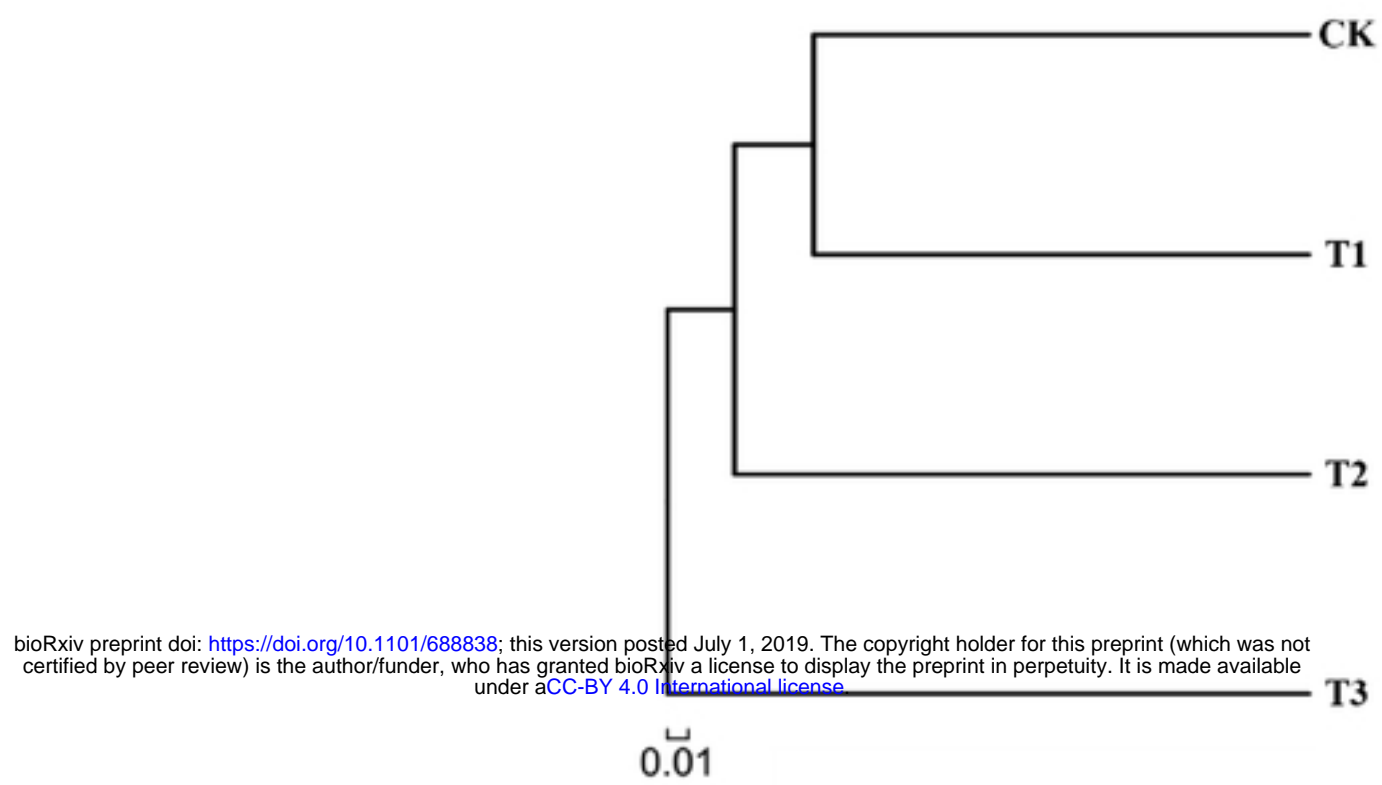

Figure 4 Cluster analysis of the DGGE profiles of 16S rDNA amplified from the tested soils
